# Supplementary material
Source: Springer Nature journal article supplement (https://www.springermedizin.de/resource/supplementary/12913_2012_2186_MOESM7_ESM.pdf/9529876)

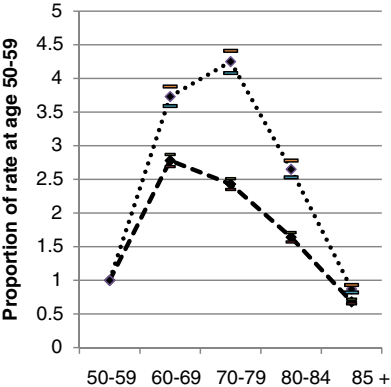

---◆--- THA Rate Ratio

...◆... TKA Rate Ratio

\*

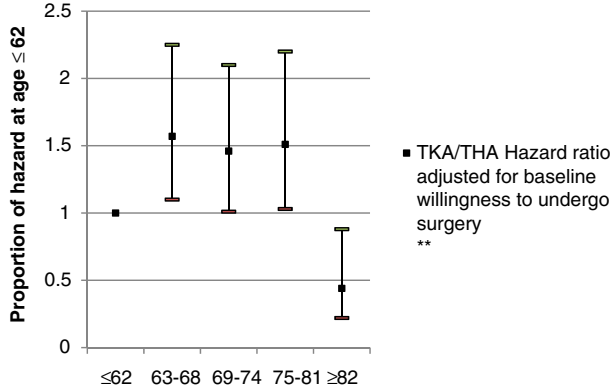

Supplement: MOESM7 [file 9529876]
